# Supplementary material for: The pan-cancer analysis of gene expression patterns in the context of inflammation
Source: Royal Society of Chemistry journal article supplement (doi:10.1039/c4mb00258j), 2014-06-24

Figure S3. The frequency plots of the inflammation-related genes in the 10 IT's segments for IBD and Hp.

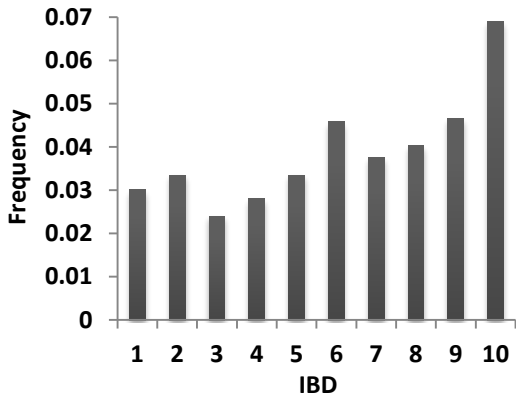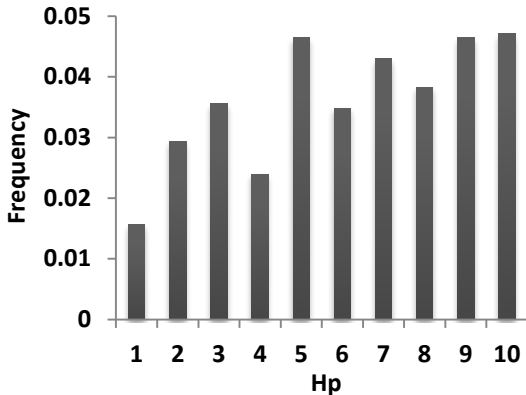

Supplement: c4mb00258j3.pdf [file c4mb00258j3.pdf]
